# Supplementary material for: Comparative analysis of machine learning algorithms for predicting Dubai property prices
Source: Frontiers journal article supplement (doi:10.3389/fams.2024.1327376), 2024-02-13
Supplement: Data_Sheet_1.docx [file Data_Sheet_1.docx]

**Appendix**

**Code**

**Python Code**

import numpy as np # linear algebra

import pandas as pd # data processing, CSV file I/O (e.g. pd.read_csv)

# visualization

import seaborn as sns

import matplotlib.pyplot as plt

%matplotlib inline

# machine learning

import seaborn as sns

from sklearn.linear_model import LinearRegression, Ridge, Lasso

from sklearn.ensemble import RandomForestRegressor, GradientBoostingRegressor

from sklearn.svm import SVR

from sklearn.neighbors import KNeighborsRegressor

from sklearn.impute import SimpleImputer

imputer=SimpleImputer(missing_values=np.nan,strategy='median')

from sklearn.ensemble import BaggingRegressor

import xgboost

from numpy import nan

from numpy import isnan

from sklearn.metrics import mean_squared_error

# Load data from a CSV file

data = pd.read_excel("Transactions_residential_flats 1BR_final.xlsx")

# Perform data cleaning steps

df = data.dropna() # Remove missing values

df = data.drop_duplicates() # Remove duplicate entries

pd.set_option('float_format', '{:f}'.format) #to see the real numbers

df.describe()

#Find if there are Null values in the data frame

df.isnull().sum()

#drop the null values from the data frame and call it upd_df

# null values are dropped as it will not impact the results

upd_df = df.dropna()

#Find if there are Null values in the data frame

upd_df.isnull().sum()

#### Convert the categories in to dummies

upd_df['trans_group'] = upd_df['trans_group'].astype('category')

upd_df.dtypes

upd_df['trans_group'] = upd_df['trans_group'].cat.codes

upd_df['procedure'] = upd_df['procedure'].astype('category')

upd_df['property_type'] = upd_df['property_type'].astype('category')

upd_df['reg_type'] = upd_df['reg_type'].astype('category')

upd_df['area_name'] = upd_df['area_name'].astype('category')

upd_df['procedure'] = upd_df['procedure'].cat.codes

upd_df['property_type'] = upd_df['property_type'].cat.codes

upd_df['reg_type'] = upd_df['reg_type'].cat.codes

upd_df['area_name'] = upd_df['area_name'].cat.codes

## Exploratory Data Analysis (EDA)

EDA is like peering into a treasure chest before diving in.

It helps us understand the characteristics of our data and uncover interesting insights.

In this section, we’ll leverage Python’s powerful libraries, such as matplotlib and seaborn, to create stunning visualizations that bring the data to life.

# Visualize the distribution of housing Size (sq.m)

import matplotlib.pyplot as plt

import seaborn as sns

sns.histplot(upd_df['price'])

plt.xlabel('Price')

plt.ylabel('Frequency')

plt.title('Distribution of Housing Price')

plt.show()

import pandas as pd

import matplotlib.pyplot as plt

# Convert date column to datetime type

upd_df['date'] = pd.to_datetime(upd_df['date'])

# Set date column as the index

upd_df.set_index('date', inplace=True)

# Visualize the average housing price over time

upd_df.resample('M')['price'].mean().plot()

plt.xlabel('Year')

plt.ylabel('Average Price in AED')

plt.title('Average Housing Price Over Time AED')

plt.show()

## Identifying Outliers

- using box plots to visualize each feature to identify if there are outliers

- using statistical method to identify the outliers

- count the number of outliers for each feature

- reveiw the statistical summary of the outliers

- drop outliers

### Box Plots

Using box plots to visualize each float64 feature in the dataframe. Created a 2 x 4 figure containing all 7 box plots. Lower and higher limit outliers will be identified.

#create box plots to visualize data and identify any outliers

#Create a figure with 2 rows with 4 boxplots each

fig, axs = plt.subplots(2, 2)

# create Price boxplot

axs[0, 0].boxplot(upd_df['price'])

axs[0, 0].set_title('Price')

# create Size boxplot

axs[0, 1].boxplot(upd_df['area size'])

axs[0, 1].set_title('Area size per square meters')

#adjust spacing for readability

fig.subplots_adjust(left=0.08, right=1, bottom=0.05, top=1,

hspace=0.5, wspace=0.5)

plt.show()

### Identifying outliers

- defined a function <code>find_outliers_IQR</code> which takes in a dataframe as an input and returns a dataframe as an output. The returned data frame contains the outliers as numerical values and others as NaN

- identified the outliers: lower limit < q1 - 1.5 * IQR and higher limit > q3 + 1.5 * IQR

def find_outliers_IQR(upd_df):

Q1 = upd_df.quantile(0.25)

Q3 = upd_df.quantile(0.75)

IQR = Q3 - Q1

outliers = upd_df[((upd_df<(Q1 - 1.5*IQR)) | (upd_df>(Q3 + 1.5*IQR)))]

return outliers

#### Outliers

Print the outliers for the feature 'Global_active_power' to identify the number of outliers, the minimum and maximum values for the outliers and to give the top and bottom five outliers for the feature. Compare the values given with the box plot.

outliers = find_outliers_IQR(upd_df['price'])

print('number of outliers: ' + str(outliers.count()))

print('min outlier value: ' + str(outliers.min()))

print('max outlier value: ' + str(outliers.max()))

outliers

#### Removing Outliers

# Define function to remove outliers using IQR

def remove_outliers_iqr(upd_df, columns):

for column in columns:

Q1 = upd_df[column].quantile(0.25)

Q3 = upd_df[column].quantile(0.75)

IQR = Q3 - Q1

lower_bound = Q1 - 1.5 * IQR

upper_bound = Q3 + 1.5 * IQR

upd_df = upd_df[(upd_df[column] >= lower_bound) & (upd_df[column] <= upper_bound)]

return upd_df

# Specify columns to remove outliers from

float_cols = upd_df.select_dtypes(include=[np.float64]).columns

# Remove outliers from float64 columns using IQR

upd_df_cleaned = remove_outliers_iqr(upd_df, float_cols)

# Print cleaned DataFrame

#print(numerical_subset_cleaned).reset_index()

upd_df_cleaned.reset_index()

##'Distribution of Housing Price after removing outliers

upd_df_cleaned['price'].hist(bins = 50, grid = False, figsize = (10,5))

plt.title('Distribution of Housing Price')

plt.show()

#create box plots to visualize data and identify any outliers

#Create a figure with 2 rows with 4 boxplots each

fig, axs = plt.subplots(2, 2)

# create Price boxplot

axs[0, 0].boxplot(upd_df_cleaned['price'])

axs[0, 0].set_title('Price')

# create Size boxplot

axs[0, 1].boxplot(upd_df_cleaned['area size'])

axs[0, 1].set_title('Area size per square meters')

#adjust spacing for readability

fig.subplots_adjust(left=0.08, right=1, bottom=0.05, top=1,

hspace=0.5, wspace=0.5)

plt.show()

##log transformation

##create a list of column names

log_df=upd_df_cleaned

col_name = list(log_df.columns)

col_name

temp_lst = ['price','area size']

for col_name in temp_lst:

log_df[col_name] = np.log(log_df[col_name])

log_df.hist(['price','area size'],figsize = (8,3), grid = False)

plt.show()

## Normalizing data

To normalize the data will use the Min - Max method: (x - Min) / (Max - Min)

## normalize the data using (x - Min) / (Max - Min)

##create a list of column names

col_name = list(log_df.columns)

col_name

## create a temporary list of the columns we want to use

##create a loop to normalize the data for each feature in temporary list

temp_lst = ['price','area size']

for col_name in temp_lst:

log_df[col_name] = (log_df[col_name] - log_df[col_name].mean())/(log_df[col_name].std())

### Grouping Data by Date

Aggregate the data by day to find the average values per month for each feature.

# average feature per month

log_df_month = log_df.groupby(['date'], as_index = True).mean()

log_df_month

# Write DataFrame to an Excel file

log_df_month.to_excel('D:/University/UTM/PhD Files/CH5/Data/dubai property_grouped.xlsx')

### Correlations

Create a correlation heat map to see if there are relationships between any of the features in the dataframe. normalized data grouped by the day.

# Correlation matrix (grouping)

plt.figure(figsize=(8,5))

sns.heatmap(log_df_month.corr().round(2),annot=True)

plt.title('Correlation matrix of log_df_month',fontsize = 10)

plt.show()

#create line plots to visualize data

#Create a figure with 2 rows with 2 boxplots each

fig, axs = plt.subplots(2, 2)

# create Price plot

axs[0, 0].plot(log_df_month['price'])

axs[0, 0].set_title('Housing Price by Date')

axs[0, 0].set_ylabel('Housing Price')

axs[0, 0].set_xlabel('Date')

# create Area Size plot

axs[1, 0].plot(log_df_month['area size'])

axs[1, 0].set_title('Area Size by Date')

axs[1, 0].set_ylabel('Area Size')

axs[1, 0].set_xlabel('Date')

#adjust spacing for readability

fig.subplots_adjust(left=0.08, right=2, bottom=0.05, top=1,

hspace=0.5, wspace=0.5)

plt.show()

# prepare date for modelling by split into training and test sets

from sklearn.model_selection import train_test_split

# Prepare the data

X = log_df_month.drop(['price'], axis = 1)

y = log_df_month['price']

# Split the data into training and testing sets

X_train, X_test, y_train, y_test = train_test_split(X, y, test_size=0.2)

# Scale the features using standardization

from sklearn.preprocessing import StandardScaler

scaler = StandardScaler()

X_train = scaler.fit_transform(X_train)

X_test = scaler.transform(X_test)

#import libraries for modeling and metrics calculations

import pandas as pd

import numpy as np

from sklearn.model_selection import train_test_split

from sklearn.preprocessing import StandardScaler

from sklearn.linear_model import LinearRegression

from sklearn.tree import DecisionTreeRegressor

from sklearn.ensemble import RandomForestRegressor

from sklearn.metrics import r2_score, mean_squared_error

from sklearn.pipeline import Pipeline

from sklearn.svm import SVR

from sklearn.neighbors import KNeighborsRegressor

from sklearn.ensemble import GradientBoostingRegressor

from sklearn.neural_network import MLPRegressor

from sklearn.metrics import mean_squared_error

from sklearn.metrics import mean_absolute_error

# Train and evaluate linear regression

lr = LinearRegression()

lr.fit(X_train, y_train)

y_pred_lr = lr.predict(X_test)

r2_lr = r2_score(y_test, y_pred_lr)

mse_lr = mean_squared_error(y_test, y_pred_lr)

RMSE_LR = math.sqrt(mse_lr)

MAPE_LR=mean_absolute_error(y_test, y_pred_lr)*100

print('Linear Regression R2 Score: ', round(r2_lr,4))

print('Linear Regression Mean Squared Error: ', round(mse_lr,4))

print('Linear Regression Root Mean Squared Error: ', round(RMSE_LR,4))

print('Linear Regression Mean Absolute Percentage Error: ', round(MAPE_LR,4))

# Train and evaluate decision tree regression

dt = DecisionTreeRegressor(random_state=42)

dt.fit(X_train, y_train)

y_pred_dt = dt.predict(X_test)

r2_dt = r2_score(y_test, y_pred_dt)

mse_dt = mean_squared_error(y_test, y_pred_dt)

RMSE_DT = math.sqrt(mse_dt)

MAPE_DT=mean_absolute_error(y_test, y_pred_dt)*100

print('Decision Tree Regression R2 Score: ', round(r2_dt,4))

print('Decision Tree Regression Mean Squared Error: ', round(mse_dt,4))

print('Decision Tree Regression Root Mean Squared Error: ', round(RMSE_DT,4))

print('Decision Tree Regression Mean Absolute Percentage Error: ', round(MAPE_DT,4))

# Train and evaluate random forest regression

rf = RandomForestRegressor(n_estimators=100, random_state=42)

rf.fit(X_train, y_train)

y_pred_rf = rf.predict(X_test)

r2_rf = r2_score(y_test, y_pred_rf)

mse_rf = mean_squared_error(y_test, y_pred_rf)

RMSE_RF = math.sqrt(mse_rf)

MAPE_RF=mean_absolute_error(y_test, y_pred_rf)*100

print('Random Forest Regression R2 Score: ', round(r2_rf,4))

print('Random Forest Regression Mean Squared Error: ', round(mse_rf,4))

print('Random Forest Regression Root Mean Squared Error: ', round(RMSE_RF,4))

print('Random Forest Regression Mean Absolute Percentage Error: ', round(MAPE_RF,4))

# Train and evaluate SVR

svr = SVR()

svr.fit(X_train, y_train)

y_pred_svr = svr.predict(X_test)

r2_svr = r2_score(y_test, y_pred_svr)

mse_svr = mean_squared_error(y_test, y_pred_svr)

RMSE_SVR = math.sqrt(mse_svr)

MAPE_SVR=mean_absolute_error(y_test, y_pred_svr)*100

print('SVR R2 Score: ', round(r2_svr,4))

print('SVR Mean Squared Error: ', round(mse_svr,4))

print('SVR Root Mean Squared Error: ', round(RMSE_SVR,4))

print('SVR Mean Absolute Percentage Error: ', round(MAPE_SVR,4))

#train and evaluate KNN

knn = KNeighborsRegressor()

knn.fit(X_train, y_train)

y_pred_knn = knn.predict(X_test)

r2_knn = r2_score(y_test, y_pred_knn)

mse_knn = mean_squared_error(y_test, y_pred_knn)

RMSE_KNN = math.sqrt(mse_knn)

MAPE_KNN=mean_absolute_error(y_test, y_pred_knn)*100

print('KNN R2 Score: ', round(r2_knn,4))

print('KNN Mean Squared Error: ', round(mse_knn,4))

print('KNN Root Mean Squared Error: ', round(RMSE_KNN,4))

print('KNN Root Mean Absolute Percentage Error: ', round(MAPE_KNN,4))

#train and evaluate GradientBoostingRegressor

gbr = GradientBoostingRegressor()

gbr.fit(X_train, y_train)

y_pred_gbr = gbr.predict(X_test)

r2_gbr = r2_score(y_test, y_pred_gbr)

mse_gbr = mean_squared_error(y_test, y_pred_gbr)

RMSE_GBR = math.sqrt(mse_gbr)

MAPE_GBR=mean_absolute_error(y_test, y_pred_gbr)*100

print('GBR R2 Score: ', round(r2_gbr,4))

print('GBR Mean Squared Error: ', round(mse_gbr,4))

print('GBR Root Mean Squared Error: ', round(RMSE_GBR,4))

print('GBR Root Mean Absolute Percentage Error: ', round(MAPE_GBR,4))

# train and evaluate ANN

ann = MLPRegressor(hidden_layer_sizes=(100, 100), max_iter=500)

ann.fit(X_train, y_train)

y_pred_ann = ann.predict(X_test)

r2_ann = r2_score(y_test, y_pred_ann)

mse_ann = mean_squared_error(y_test, y_pred_ann)

RMSE_ANN = math.sqrt(mse_ann)

MAPE_ANN=mean_absolute_error(y_test, y_pred_ann)*100

print('ANN R2 Score: ', round(r2_ann,4))

print('ANN Mean Squared Error: ', round(mse_ann,4))

print('ANN Root Mean Squared Error: ', round(RMSE_ANN,4))

print('ANN Root Mean Absolute Percentage Error: ', round(MAPE_ANN,4))

#Plot the RMSE across models

model_comparison = pd.DataFrame({'model': [ 'Support Vector Machine',

'Gradient Boosted','Random Forest',

'KNN', 'ANN','Decision Tree','Linear Regression','EEMD-SD-SVM'],

'RMSE': [RMSE_SVR, RMSE_GBR,RMSE_RF, RMSE_KNN,RMSE_ANN,RMSE_DT,RMSE_LR,0.301]})

model_comparison.sort_values('RMSE', ascending = False).plot(x = 'model',

y = 'RMSE', kind = 'barh',

edgecolor = 'black', figsize = (6,3))

plt.xlabel('Root Mean Squared Error')

plt.title('Model Comparison on Test RMSE')

plt.show()

#features important

# Create a bar chart to visualize feature importance

feature_importances.sort()

plt.figure(figsize=(5, 3))

plt.barh(X.columns, feature_importances)

plt.title('Feature Importance')

plt.xlabel('Features Score')

plt.ylabel('Importance')

#plt.xticks(rotation=45)

plt.show()

#perform Friedman test for model comparison

import pandas as pd

from scipy.stats import friedmanchisquare

# Assuming the performance metrics (pm) is stored in a DataFrame where each column represents a model

# and each row represents a dataset/scenario

pm = {'SVM': [0.3440, 0.1232,0.351,25.1032],

'Gradient Boost': [0.3402, 0.1239, 0.352, 25.3897],

'Random Forest': [0.2952, 0.1324, 0.3638, 26.0751],

'KNN': [0.2569, 0.1396, 0.3736, 27.4998],

'Linear Regression': [0.3039, 0.1297, 0.3602, 26.3541],

'ANN': [0.2559, 0.1397, 0.3738, 27.2651],

'Decision Tree': [-0.2841, 0.2412, 0.4911, 35.9393],

'EEMD_SVM': [0.541, 0.09, 0.301, 3.3310]}

# Create a DataFrame from the data

pm_df = pd.DataFrame(pm)

# Perform the Friedman test

friedman_result = friedmanchisquare(*[pm_df[model] for model in pm_df.columns])

# Display the Friedman test result

print("Friedman Test Statistic:", friedman_result.statistic)

print("p-value:", friedman_result.pvalue)

**R Code for EEMD-SD-SVM**

# Transactions_residential_flats DUBA DATA

DF <- read_xlsx("D:/University/UTM/PhD Files/CH5/Data/dubai property_grouped.xlsx")

DF_new <- DF[c('date','price')]

DF$date <- as.Date(DF$date)

DF_TS <- ts(DF$price, start = c(2005,6), frequency = 30)

df_ts_eemd <- eemd(DF_TS)

#auto correlation of all IMFs

# UK data

k = length(df_ts_eemd)/length(DF_TS); # Total number of IMFs

for (i in 1:k)

{v<-df_ts_eemd[ ,i]

print(cor(v[-1], v[-length(v)]))}

EEMD_R <- rowSums(df_ts_eemd[,c(1,2,3)])

EEMD_D <- rowSums(df_ts_eemd[,c(4,5,5,6,7,8,9,10,11)])

############

## Random DATA

#model_r

# linear kernel

features <- DF %>% select(-price)

model_r <- svm(EEMD_R ~ ., data = features, kernel = "radial")

#model_d

# linear kernel

model_d <- svm(EEMD_D ~ ., data = features, kernel = "radial")

eemd_rd_svm = model_r$fitted+model_d$fitted

# Accuracy

mse_eemd_rd_svm=round(mse(DF_TS,eemd_rd_svm),3)

mad_eemd_rd_svm=round(mad(DF_TS,eemd_rd_svm),3)

rmse_eemd_rd_svm=round(rmse(DF_TS,eemd_rd_svm),3)

mape_eemd_rd_svm=round(mape(DF_TS,eemd_rd_svm),3)

mae_eemd_rd_svm=round(mae(DF_TS,eemd_rd_svm),3)

mase_eemd_rd_svm=round(mase(DF_TS,eemd_rd_svm),3)

#rsquared <- summary(model)$r.squared

### R2

residuals <- DF_TS-eemd_rd_svm

# Calculate the sum of squared residuals

sum_sq_residuals <- sum(residuals^2)

# Calculate the total sum of squares

mean_y <- mean(DF_TS)

total_sum_sq <- sum((DF_TS - mean(DF_TS))^2)

# Calculate R-squared using the formula

rsquared <- 1 - (sum_sq_residuals / total_sum_sq)

# Print R-squared value

print(rsquared)
